# Supplementary material for: Magnetic resin composites for the enrichment of proteins, peptides and phosphopeptides
Source: Royal Society of Chemistry journal article supplement (doi:10.1039/d3ay01068f), 2023-01-01
Supplement: d3ay01068f1.pdf [file d3ay01068f1.pdf]

**Supplementary information for**  
**“Magnetic resin composites for the enrichment of proteins,**  
**peptides and phosphopeptides”**

Yu Wang<sup>1</sup>, Yini Pan<sup>1</sup>, Zhichao Yan, Zhihua Zhong, Lingyi Zhang\*, Weibing Zhang\*

Shanghai Key Laboratory of Functional Materials Chemistry, School of Chemistry  
and Molecular Engineering, East China University of Science and Technology,  
Shanghai, 200237, PR China

<sup>1</sup> Yu Wang and Yini Pan contributed equally to this work.

**\*Corresponding author**

Prof. Weibing Zhang: [weibingzhang@ecust.edu.cn](mailto:weibingzhang@ecust.edu.cn)

Dr. Lingyi Zhang: [zhanglingyi@ecust.edu.cn](mailto:zhanglingyi@ecust.edu.cn)

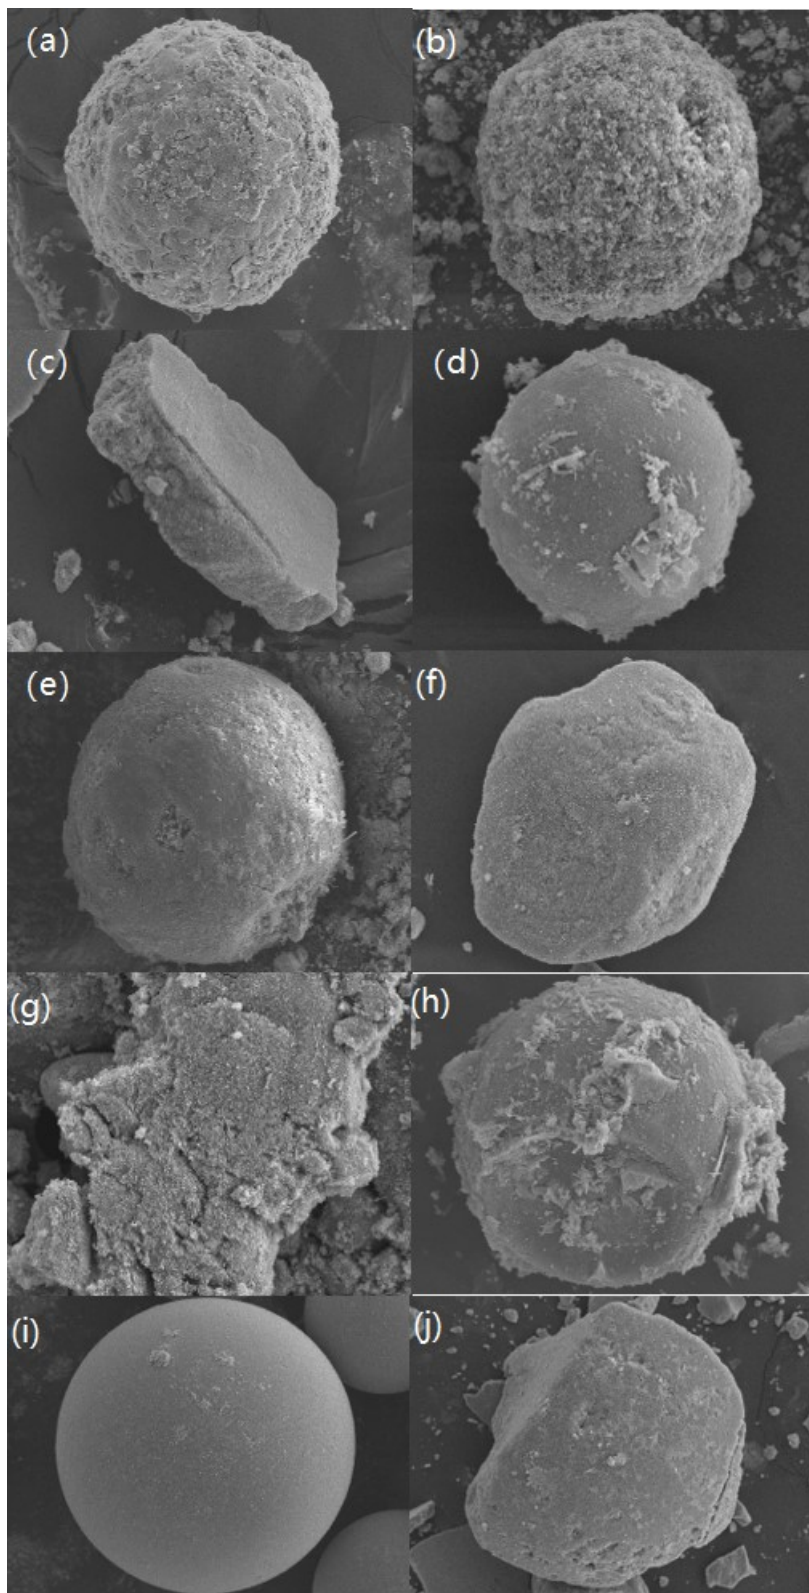

**Fig. S1.** SEM images of (a) A400@Fe<sub>3</sub>O<sub>4</sub>, (b) ES-103B@Fe<sub>3</sub>O<sub>4</sub>, (c) C115@Fe<sub>3</sub>O<sub>4</sub>, (d) XT20@Fe<sub>3</sub>O<sub>4</sub>, (e) ESR-3@Fe<sub>3</sub>O<sub>4</sub>, (f) C107@Fe<sub>3</sub>O<sub>4</sub>, (g) PAD428@Fe<sub>3</sub>O<sub>4</sub>, (h) 70MN@Fe<sub>3</sub>O<sub>4</sub>, (i) PDA550@Fe<sub>3</sub>O<sub>4</sub>, and (j) AB-8@Fe<sub>3</sub>O<sub>4</sub>.

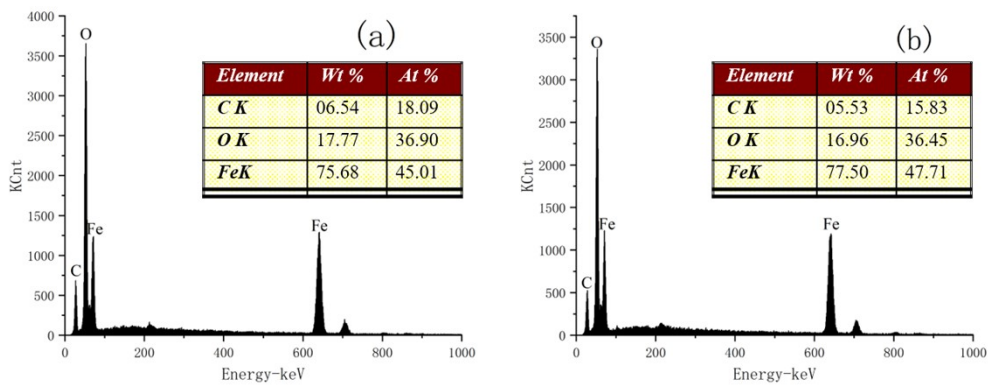

**Fig. S2.** EDS images of MTS9200@Fe<sub>3</sub>O<sub>4</sub> and FPA90Cl@Fe<sub>3</sub>O<sub>4</sub>.

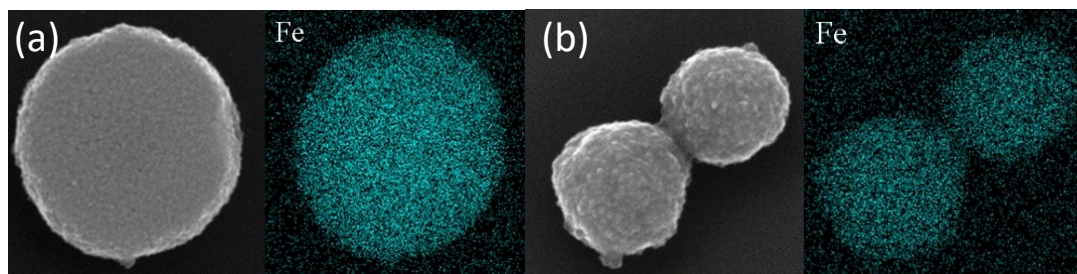

**Fig. S3.** EDS mapping of FPA90CL@Fe<sub>3</sub>O<sub>4</sub> (a) and MTS9200@Fe<sub>3</sub>O<sub>4</sub> (b).

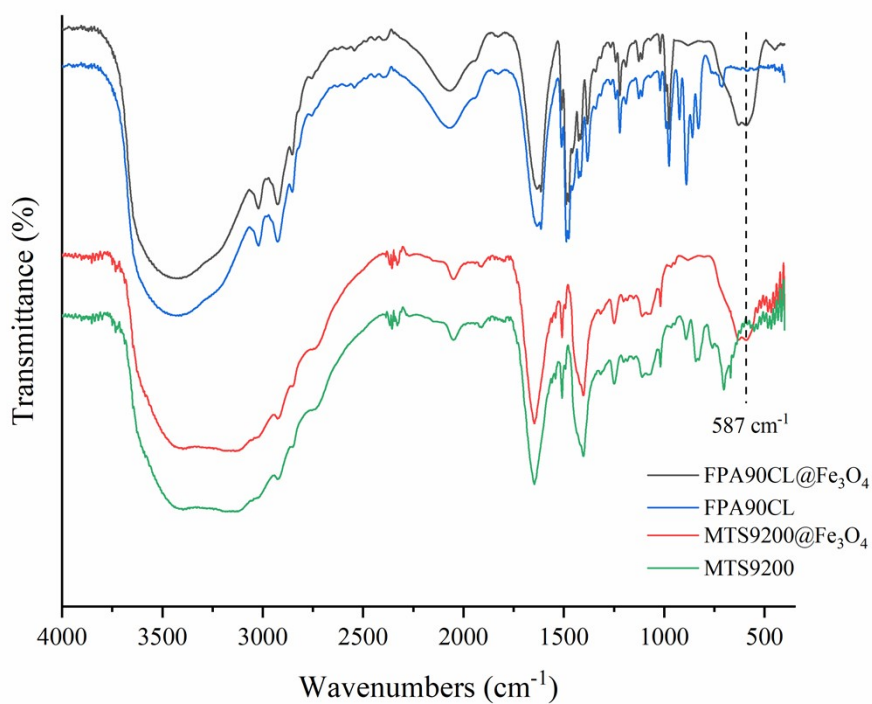

**Fig. S4.** FT-IR spectra of magnetic resin composites.

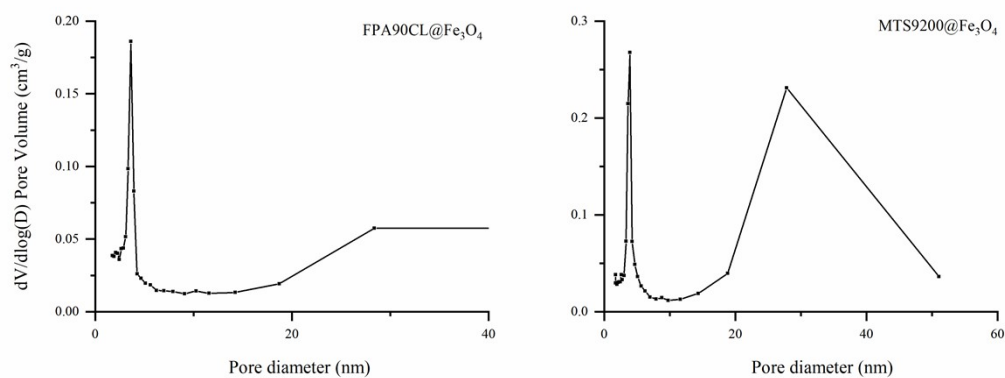

**Fig. S5.** Pore diameter distribution of FPA90CL@Fe<sub>3</sub>O<sub>4</sub> and MTS9200@Fe<sub>3</sub>O<sub>4</sub>.

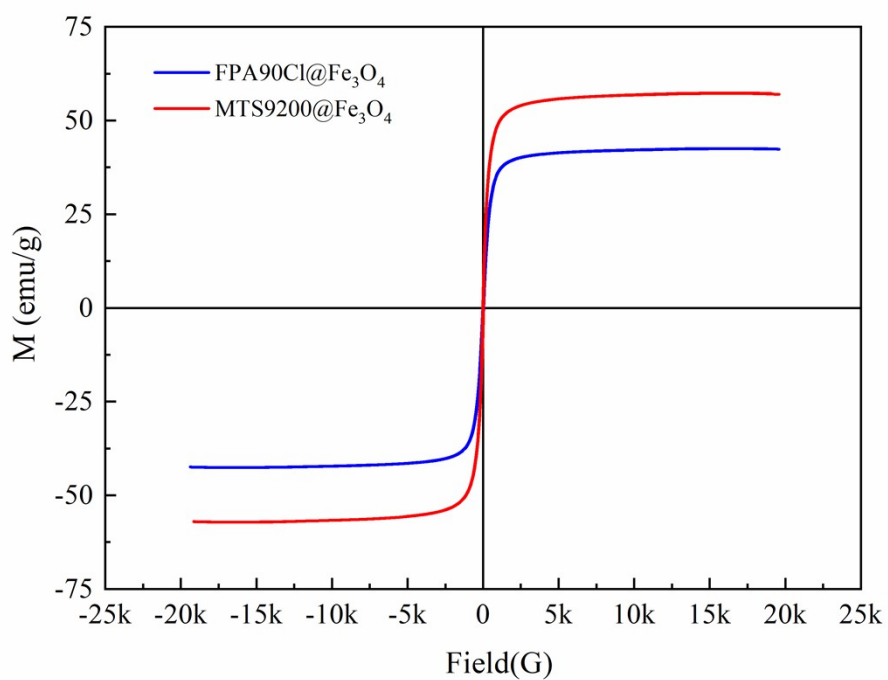

**Fig.S6.** VSM spectra of MTS9200@Fe<sub>3</sub>O<sub>4</sub> and FPA90CL@Fe<sub>3</sub>O<sub>4</sub>.

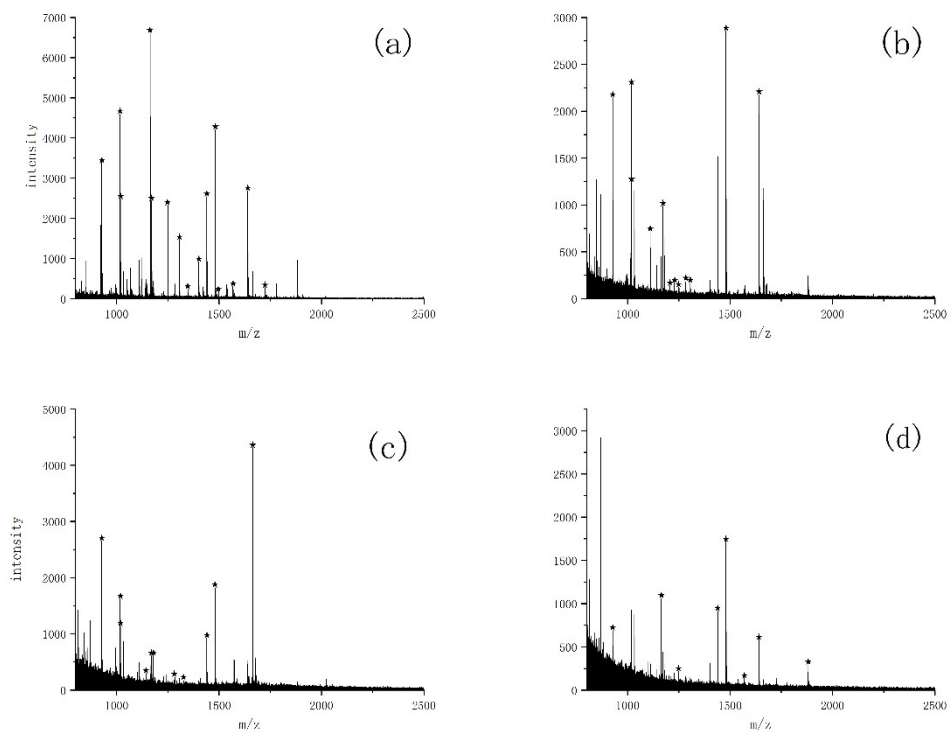

**Fig. S7.** MALDI-TOF mass spectra of BSA peptides after adsorption by FPA90Cl@Fe<sub>3</sub>O<sub>4</sub> loading in amount of (a) 10 μL, (b) 5 μL, (c) 2 μL, and (d) 1 μL.

★ indicates BSA peptides.

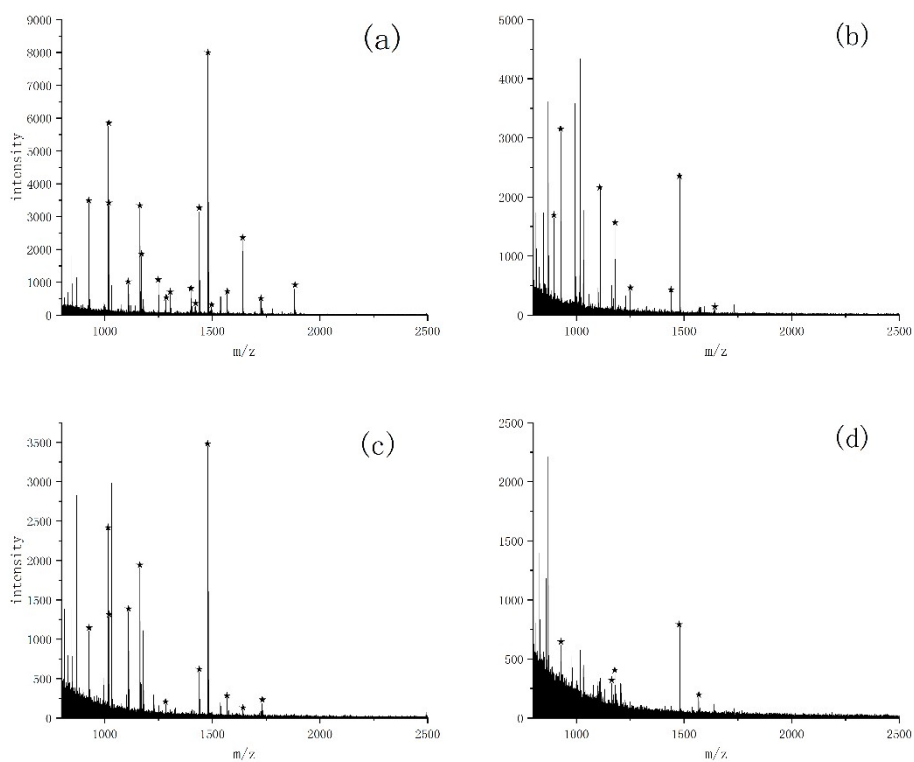

**Fig. S8.** MALDI-TOF mass spectra of BSA peptides after adsorption by MTS9200@Fe<sub>3</sub>O<sub>4</sub> loading in amount of (a) 10 μL, (b) 5 μL, (c) 2 μL, and (d) 1 μL.

★ indicates peptides.

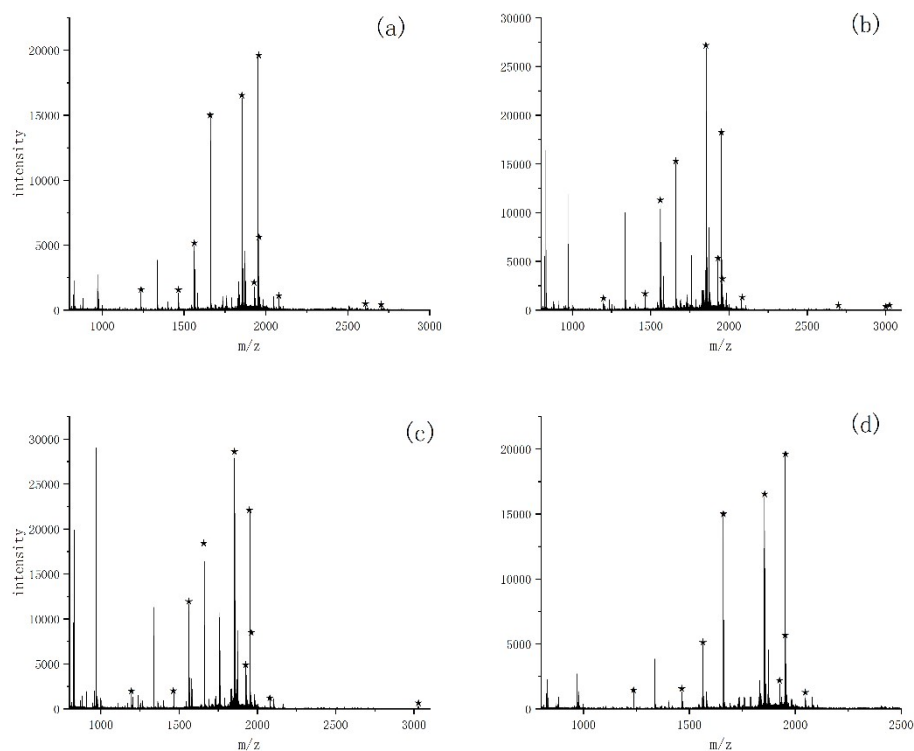

**Fig. S9.** MALDI-TOF mass spectra of  $\alpha$ -casein after adsorption by FPA90Cl@Fe<sub>3</sub>O<sub>4</sub> loading in amount of (a) 10  $\mu$ L, (b) 5  $\mu$ L, (c) 2  $\mu$ L, and (d) 1  $\mu$ L. ★ indicates phosphopeptides.

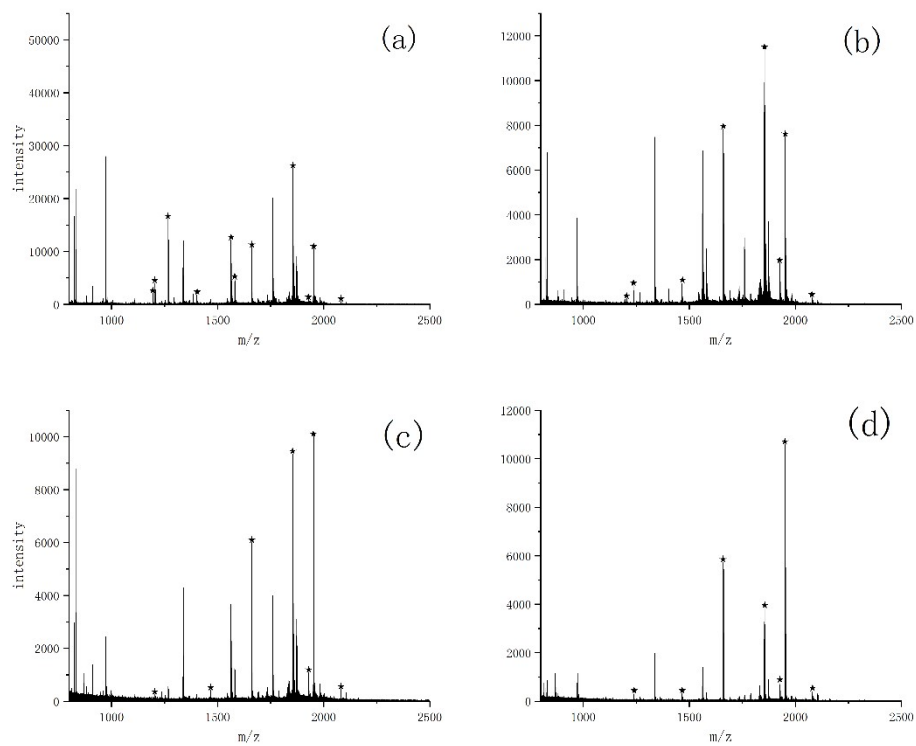

**Fig. S10.** MALDI-TOF mass spectra of  $\alpha$ -casein after adsorption by MTS9200@Fe<sub>3</sub>O<sub>4</sub> loading in amount of (a) 10  $\mu$ L, (b) 5  $\mu$ L, (c) 2  $\mu$ L, and (d) 1  $\mu$ L.

★ indicates phosphopeptides.



**Table S1.** Detailed information of 12 types of resins.

| No | Type        | Functional groups          | Skeletal substrate     | Interaction type           |
|----|-------------|----------------------------|------------------------|----------------------------|
| 1  | A400        | Type I quaternary ammonium | Polystyrene            | Strong base anion exchange |
| 2  | C115        | Carboxylic acid            | Polymethacrylic acid   | Weak acid cation exchange  |
| 3  | PAD428      | None                       | Brominated polystyrene | Adsorption                 |
| 4  | C107        | Carboxylic acid            | Polyacrylic acid       | Weak acid cation exchange  |
| 5  | MTS920<br>0 | Isothiourea                | Polystyrene            | Chelation                  |
| 6  | 70MN        | None                       | Polystyrene            | Adsorption                 |
| 7  | FPA90C<br>L | Quaternary amine           | Polystyrene            | Strong base anion exchange |
| 8  | PAD550      | None                       | Polystyrene            | Adsorption                 |
| 9  | AB-8        | None                       | Polystyrene            | Adsorption                 |
| 10 | ESR-3       | None                       | /                      | Amino Resins               |
| 11 | ES-103B     | None                       | /                      | Epoxy resin                |
| 12 | XT20        | None                       | Polystyrene            | Adsorption                 |
